# Supplementary material for: Hybridization and gene flow in the mega-pest lineage of moth, Helicoverpa
Source: PubMed Central journal article supplement — Proc Natl Acad Sci U S A. 2018 Apr 2;115(19):5034–9. doi: 10.1073/pnas.1718831115 (PMC5948968; doi:10.1073/pnas.1718831115), 2018-04-02
Supplement: pnas.1718831115.sd01.pdf [file pnas.1718831115.sd01.pdf]

Dataset S1.  $f_3$  results for all tested population combinations. Where species have been randomly split into two groups to test for admixture, the species name followed by a number is given to denote which of the two groups is tested.

| Source Population 1   | Source Population 2   | Target Population     | $f_3$    | Standard Error | Z      | Number of SNPs |
|-----------------------|-----------------------|-----------------------|----------|----------------|--------|----------------|
| H. armigera conferta1 | H. assulta1           | H. armigera conferta2 | 0.006369 | 0.000189       | 33.619 | 368356         |
| H. armigera conferta1 | H. assulta2           | H. armigera conferta2 | 0.006742 | 0.000186       | 36.213 | 368364         |
| H. armigera conferta1 | H. punctigera2        | H. armigera conferta2 | 0.006748 | 0.000177       | 38.139 | 368277         |
| H. armigera conferta1 | H. armigera armigera2 | H. armigera conferta2 | 0.00676  | 0.000198       | 34.148 | 368271         |
| H. armigera conferta1 | H. armigera armigera1 | H. armigera conferta2 | 0.006766 | 0.000193       | 35.07  | 368271         |
| H. armigera conferta1 | H. punctigera1        | H. armigera conferta2 | 0.006795 | 0.000185       | 36.709 | 368276         |
| H. armigera conferta2 | H. punctigera1        | H. armigera conferta1 | 0.007029 | 0.000151       | 46.616 | 368276         |
| H. armigera conferta2 | H. armigera armigera1 | H. armigera conferta1 | 0.007057 | 0.000142       | 49.63  | 368271         |
| H. armigera conferta2 | H. armigera armigera2 | H. armigera conferta1 | 0.007063 | 0.000152       | 46.549 | 368271         |
| H. armigera conferta2 | H. punctigera2        | H. armigera conferta1 | 0.007075 | 0.00015        | 47.223 | 368277         |
| H. armigera conferta2 | H. assulta2           | H. armigera conferta1 | 0.00708  | 0.000157       | 45.026 | 368364         |
| H. armigera conferta2 | H. assulta1           | H. armigera conferta1 | 0.007445 | 0.000147       | 50.584 | 368356         |
| H. armigera armigera2 | H. assulta1           | H. armigera armigera1 | 0.008965 | 0.000122       | 73.58  | 368272         |
| H. armigera armigera2 | H. assulta2           | H. armigera armigera1 | 0.009027 | 0.000122       | 73.913 | 368273         |
| H. zea2               | H. armigera armigera2 | H. armigera armigera1 | 0.009206 | 0.000128       | 71.736 | 368271         |
| H. zea1               | H. armigera armigera2 | H. armigera armigera1 | 0.009222 | 0.000129       | 71.444 | 368271         |
| H. armigera conferta1 | H. armigera armigera2 | H. armigera armigera1 | 0.009507 | 0.000116       | 81.829 | 368271         |
| H. armigera conferta2 | H. armigera armigera2 | H. armigera armigera1 | 0.009514 | 0.000117       | 81.644 | 368271         |
| H. armigera conferta2 | H. armigera armigera1 | H. armigera armigera2 | 0.011947 | 0.000212       | 56.244 | 368271         |
| H. armigera conferta1 | H. armigera armigera1 | H. armigera armigera2 | 0.011955 | 0.000209       | 57.108 | 368271         |
| H. zea1               | H. armigera armigera1 | H. armigera armigera2 | 0.012237 | 0.000172       | 71.178 | 368271         |
| H. zea2               | H. armigera armigera1 | H. armigera armigera2 | 0.012252 | 0.00017        | 71.956 | 368271         |
| H. armigera armigera1 | H. assulta2           | H. armigera armigera2 | 0.012429 | 0.000175       | 71.007 | 368273         |
| H. armigera armigera1 | H. assulta1           | H. armigera armigera2 | 0.012491 | 0.000177       | 70.618 | 368272         |

|                       |                       |                 |          |          |         |        |
|-----------------------|-----------------------|-----------------|----------|----------|---------|--------|
| H. punctigera1        | H. gelotopoeon1       | H. punctigera2  | 0.022854 | 0.00046  | 49.689  | 433409 |
| H. punctigera1        | H. gelotopoeon2       | H. punctigera2  | 0.02304  | 0.00047  | 48.974  | 426123 |
| H. armigera conferta2 | H. punctigera1        | H. punctigera2  | 0.023142 | 0.000517 | 44.804  | 368285 |
| H. zea2               | H. gelotopoeon1       | H. zea1         | 0.023173 | 0.001351 | 17.15   | 395781 |
| H. armigera conferta1 | H. punctigera1        | H. punctigera2  | 0.023238 | 0.000535 | 43.442  | 368292 |
| H. zea2               | H. gelotopoeon2       | H. zea1         | 0.023691 | 0.001343 | 17.643  | 391845 |
| H. zea2               | H. armigera armigera2 | H. zea1         | 0.024    | 0.001354 | 17.73   | 368275 |
| H. zea2               | H. armigera armigera1 | H. zea1         | 0.024034 | 0.001354 | 17.745  | 368271 |
| H. armigera conferta1 | H. punctigera2        | H. punctigera1  | 0.035304 | 0.000326 | 108.347 | 368292 |
| H. armigera conferta2 | H. punctigera2        | H. punctigera1  | 0.0354   | 0.00033  | 107.136 | 368285 |
| H. punctigera2        | H. gelotopoeon2       | H. punctigera1  | 0.035503 | 0.00036  | 98.678  | 426123 |
| H. punctigera2        | H. gelotopoeon1       | H. punctigera1  | 0.035689 | 0.000364 | 97.969  | 433409 |
| H. zea1               | H. armigera armigera1 | H. zea2         | 0.039855 | 0.000556 | 71.652  | 368271 |
| H. zea1               | H. armigera armigera2 | H. zea2         | 0.039889 | 0.000547 | 72.906  | 368275 |
| H. zea1               | H. gelotopoeon2       | H. zea2         | 0.040194 | 0.000598 | 67.266  | 391845 |
| H. zea1               | H. gelotopoeon1       | H. zea2         | 0.040704 | 0.000538 | 75.649  | 395781 |
| H. zea2               | H. gelotopoeon1       | H. gelotopoeon2 | 0.076696 | 0.00389  | 19.716  | 387468 |
| H. zea1               | H. gelotopoeon1       | H. gelotopoeon2 | 0.077222 | 0.003908 | 19.758  | 387138 |
| H. punctigera1        | H. gelotopoeon1       | H. gelotopoeon2 | 0.08302  | 0.003988 | 20.816  | 424685 |
| H. punctigera2        | H. gelotopoeon1       | H. gelotopoeon2 | 0.083264 | 0.003978 | 20.932  | 420665 |
| H. punctigera2        | H. gelotopoeon2       | H. gelotopoeon1 | 0.129685 | 0.005299 | 24.474  | 420665 |
| H. punctigera1        | H. gelotopoeon2       | H. gelotopoeon1 | 0.129934 | 0.005309 | 24.473  | 424685 |
| H. zea1               | H. gelotopoeon2       | H. gelotopoeon1 | 0.135834 | 0.005438 | 24.978  | 387138 |
| H. zea2               | H. gelotopoeon2       | H. gelotopoeon1 | 0.136369 | 0.005464 | 24.958  | 387468 |
| H. assulta1           | H. hardwicki          | H. assulta2     | 0.467558 | 0.008734 | 53.535  | 527116 |
| H. armigera conferta1 | H. assulta1           | H. assulta2     | 0.502221 | 0.008973 | 55.969  | 368406 |
| H. armigera conferta2 | H. assulta1           | H. assulta2     | 0.503771 | 0.008993 | 56.018  | 368418 |
| H. armigera armigera1 | H. assulta2           | H. assulta1     | 0.504136 | 0.00944  | 53.404  | 368272 |
| H. armigera armigera2 | H. assulta2           | H. assulta1     | 0.5044   | 0.009512 | 53.028  | 368274 |

|                       |                      |                      |          |          |        |        |
|-----------------------|----------------------|----------------------|----------|----------|--------|--------|
| H. armigera armigera2 | H. assulta1          | H. assulta2          | 0.509249 | 0.00904  | 56.335 | 368274 |
| H. armigera armigera1 | H. assulta1          | H. assulta2          | 0.509463 | 0.009086 | 56.073 | 368272 |
| H. armigera conferta2 | H. assulta2          | H. assulta1          | 0.511169 | 0.009551 | 53.519 | 368418 |
| H. armigera conferta1 | H. assulta2          | H. assulta1          | 0.513084 | 0.009594 | 53.477 | 368406 |
| H. hardwicki          | H. assulta2          | H. assulta1          | 0.555914 | 0.009974 | 55.735 | 527116 |
| H. assulta2           | H. assulta1          | H. hardwicki         | 1.018247 | 0.032779 | 31.064 | 527116 |
| H. armigera armigera  | H. zea               | H. assulta           | 0.543604 | 0.013301 | 40.87  | 368271 |
| H. armigera armigera  | H. zea               | H. gelotopoeon       | 0.359281 | 0.011467 | 31.332 | 368271 |
| H. armigera armigera  | H. zea               | H. armigera conferta | 0.026528 | 0.001396 | 19.002 | 368271 |
| H. armigera armigera  | H. zea               | H. hardwicki         | 0.830743 | 0.021133 | 39.309 | 368271 |
| H. armigera armigera  | H. zea               | H. punctigera        | 0.381996 | 0.008688 | 43.97  | 368271 |
| H. armigera armigera  | H. assulta           | H. zea               | 0.611656 | 0.015188 | 40.272 | 368271 |
| H. armigera armigera  | H. assulta           | H. gelotopoeon       | 0.327408 | 0.009934 | 32.958 | 368271 |
| H. armigera armigera  | H. assulta           | H. armigera conferta | 0.026782 | 0.001375 | 19.485 | 368271 |
| H. armigera armigera  | H. assulta           | H. hardwicki         | 0.734689 | 0.021626 | 33.972 | 368272 |
| H. armigera armigera  | H. assulta           | H. punctigera        | 0.35646  | 0.007645 | 46.627 | 368271 |
| H. armigera armigera  | H. gelotopoeon       | H. zea               | 0.614654 | 0.015125 | 40.638 | 368271 |
| H. armigera armigera  | H. gelotopoeon       | H. assulta           | 0.510722 | 0.012539 | 40.732 | 368271 |
| H. armigera armigera  | H. gelotopoeon       | H. armigera conferta | 0.028975 | 0.00131  | 22.126 | 368271 |
| H. armigera armigera  | H. gelotopoeon       | H. hardwicki         | 0.838412 | 0.021352 | 39.266 | 368271 |
| H. armigera armigera  | H. gelotopoeon       | H. punctigera        | 0.285998 | 0.006133 | 46.636 | 368271 |
| H. armigera armigera  | H. armigera conferta | H. zea               | 0.705617 | 0.016589 | 42.534 | 368271 |
| H. armigera armigera  | H. armigera conferta | H. assulta           | 0.645844 | 0.014688 | 43.972 | 368271 |
| H. armigera armigera  | H. armigera conferta | H. gelotopoeon       | 0.452051 | 0.013049 | 34.644 | 368271 |
| H. armigera armigera  | H. armigera conferta | H. hardwicki         | 0.909124 | 0.023932 | 37.988 | 368271 |
| H. armigera armigera  | H. armigera conferta | H. punctigera        | 0.454369 | 0.009973 | 45.561 | 368271 |
| H. armigera armigera  | H. hardwicki         | H. zea               | 0.601871 | 0.014509 | 41.481 | 368271 |
| H. armigera armigera  | H. hardwicki         | H. assulta           | 0.423695 | 0.013309 | 31.835 | 368272 |
| H. armigera armigera  | H. hardwicki         | H. gelotopoeon       | 0.354803 | 0.010815 | 32.806 | 368271 |

|                      |                      |                      |          |          |        |        |
|----------------------|----------------------|----------------------|----------|----------|--------|--------|
| H. armigera armigera | H. hardwicki         | H. armigera conferta | 0.018346 | 0.001441 | 12.729 | 368271 |
| H. armigera armigera | H. hardwicki         | H. punctigera        | 0.365071 | 0.008337 | 43.787 | 368271 |
| H. armigera armigera | H. punctigera        | H. zea               | 0.612091 | 0.014967 | 40.895 | 368271 |
| H. armigera armigera | H. punctigera        | H. assulta           | 0.508812 | 0.01229  | 41.399 | 368271 |
| H. armigera armigera | H. punctigera        | H. gelotopoeon       | 0.239866 | 0.007845 | 30.577 | 368271 |
| H. armigera armigera | H. punctigera        | H. armigera conferta | 0.026124 | 0.001347 | 19.394 | 368271 |
| H. armigera armigera | H. punctigera        | H. hardwicki         | 0.819908 | 0.021109 | 38.841 | 368271 |
| H. zea               | H. armigera armigera | H. assulta           | 0.543604 | 0.013301 | 40.87  | 368271 |
| H. zea               | H. armigera armigera | H. gelotopoeon       | 0.359281 | 0.011467 | 31.332 | 368271 |
| H. zea               | H. armigera armigera | H. armigera conferta | 0.026528 | 0.001396 | 19.002 | 368271 |
| H. zea               | H. armigera armigera | H. hardwicki         | 0.830743 | 0.021133 | 39.309 | 368271 |
| H. zea               | H. armigera armigera | H. punctigera        | 0.381996 | 0.008688 | 43.97  | 368271 |
| H. zea               | H. assulta           | H. armigera armigera | 0.050579 | 0.00103  | 49.117 | 368271 |
| H. zea               | H. assulta           | H. gelotopoeon       | 0.330265 | 0.009964 | 33.145 | 374536 |
| H. zea               | H. assulta           | H. armigera conferta | 0.063134 | 0.001893 | 33.348 | 368272 |
| H. zea               | H. assulta           | H. hardwicki         | 0.725409 | 0.020845 | 34.801 | 386061 |
| H. zea               | H. assulta           | H. punctigera        | 0.356798 | 0.00752  | 47.445 | 373995 |
| H. zea               | H. gelotopoeon       | H. armigera armigera | 0.049184 | 0.000938 | 52.46  | 368271 |
| H. zea               | H. gelotopoeon       | H. assulta           | 0.507483 | 0.012685 | 40.005 | 374536 |
| H. zea               | H. gelotopoeon       | H. armigera conferta | 0.064167 | 0.00175  | 36.668 | 368271 |
| H. zea               | H. gelotopoeon       | H. hardwicki         | 0.826286 | 0.020694 | 39.928 | 375848 |
| H. zea               | H. gelotopoeon       | H. punctigera        | 0.283991 | 0.005986 | 47.444 | 373467 |
| H. zea               | H. armigera conferta | H. armigera armigera | 0.006811 | 0.000304 | 22.401 | 368271 |
| H. zea               | H. armigera conferta | H. assulta           | 0.544313 | 0.013349 | 40.775 | 368272 |
| H. zea               | H. armigera conferta | H. gelotopoeon       | 0.365313 | 0.011411 | 32.015 | 368271 |
| H. zea               | H. armigera conferta | H. hardwicki         | 0.810664 | 0.021113 | 38.396 | 368272 |
| H. zea               | H. armigera conferta | H. punctigera        | 0.381179 | 0.00866  | 44.015 | 368271 |
| H. zea               | H. hardwicki         | H. armigera armigera | 0.055138 | 0.001551 | 35.547 | 368271 |
| H. zea               | H. hardwicki         | H. assulta           | 0.434265 | 0.013775 | 31.525 | 386061 |

|            |                      |                      |          |          |        |        |
|------------|----------------------|----------------------|----------|----------|--------|--------|
| H. zea     | H. hardwicki         | H. gelotopoeon       | 0.366986 | 0.011718 | 31.319 | 375848 |
| H. zea     | H. hardwicki         | H. armigera conferta | 0.058484 | 0.002404 | 24.328 | 368272 |
| H. zea     | H. hardwicki         | H. punctigera        | 0.373062 | 0.008921 | 41.817 | 375574 |
| H. zea     | H. punctigera        | H. armigera armigera | 0.050378 | 0.000935 | 53.867 | 368271 |
| H. zea     | H. punctigera        | H. assulta           | 0.508342 | 0.01273  | 39.933 | 373995 |
| H. zea     | H. punctigera        | H. gelotopoeon       | 0.242311 | 0.00798  | 30.365 | 373467 |
| H. zea     | H. punctigera        | H. armigera conferta | 0.062308 | 0.001778 | 35.039 | 368271 |
| H. zea     | H. punctigera        | H. hardwicki         | 0.810214 | 0.02063  | 39.274 | 375574 |
| H. assulta | H. armigera armigera | H. zea               | 0.611656 | 0.015188 | 40.272 | 368271 |
| H. assulta | H. armigera armigera | H. gelotopoeon       | 0.327408 | 0.009934 | 32.958 | 368271 |
| H. assulta | H. armigera armigera | H. armigera conferta | 0.026782 | 0.001375 | 19.485 | 368271 |
| H. assulta | H. armigera armigera | H. hardwicki         | 0.734689 | 0.021626 | 33.972 | 368272 |
| H. assulta | H. armigera armigera | H. punctigera        | 0.35646  | 0.007645 | 46.627 | 368271 |
| H. assulta | H. zea               | H. armigera armigera | 0.050579 | 0.00103  | 49.117 | 368271 |
| H. assulta | H. zea               | H. gelotopoeon       | 0.330265 | 0.009964 | 33.145 | 374536 |
| H. assulta | H. zea               | H. armigera conferta | 0.063134 | 0.001893 | 33.348 | 368272 |
| H. assulta | H. zea               | H. hardwicki         | 0.725409 | 0.020845 | 34.801 | 386061 |
| H. assulta | H. zea               | H. punctigera        | 0.356798 | 0.00752  | 47.445 | 373995 |
| H. assulta | H. gelotopoeon       | H. armigera armigera | 0.064757 | 0.001773 | 36.523 | 368271 |
| H. assulta | H. gelotopoeon       | H. zea               | 0.645089 | 0.016416 | 39.297 | 374536 |
| H. assulta | H. gelotopoeon       | H. armigera conferta | 0.077356 | 0.002414 | 32.038 | 368272 |
| H. assulta | H. gelotopoeon       | H. hardwicki         | 0.761955 | 0.02268  | 33.596 | 388558 |
| H. assulta | H. gelotopoeon       | H. punctigera        | 0.284612 | 0.006082 | 46.792 | 383006 |
| H. assulta | H. armigera conferta | H. armigera armigera | 0.006505 | 0.000323 | 20.11  | 368271 |
| H. assulta | H. armigera conferta | H. zea               | 0.611    | 0.015153 | 40.321 | 368272 |
| H. assulta | H. armigera conferta | H. gelotopoeon       | 0.332814 | 0.009882 | 33.677 | 368272 |
| H. assulta | H. armigera conferta | H. hardwicki         | 0.713989 | 0.021552 | 33.129 | 368291 |
| H. assulta | H. armigera conferta | H. punctigera        | 0.35513  | 0.007593 | 46.772 | 368274 |
| H. assulta | H. hardwicki         | H. armigera armigera | 0.102263 | 0.001627 | 62.857 | 368272 |

|                |                      |                      |          |          |        |        |
|----------------|----------------------|----------------------|----------|----------|--------|--------|
| H. assulta     | H. hardwicki         | H. zea               | 0.712831 | 0.013818 | 51.588 | 386061 |
| H. assulta     | H. hardwicki         | H. gelotopoeon       | 0.431601 | 0.009154 | 47.15  | 388558 |
| H. assulta     | H. hardwicki         | H. armigera conferta | 0.097877 | 0.002035 | 48.095 | 368291 |
| H. assulta     | H. hardwicki         | H. punctigera        | 0.426708 | 0.0069   | 61.84  | 388924 |
| H. assulta     | H. punctigera        | H. armigera armigera | 0.065581 | 0.001701 | 38.553 | 368271 |
| H. assulta     | H. punctigera        | H. zea               | 0.644294 | 0.016288 | 39.556 | 373995 |
| H. assulta     | H. punctigera        | H. gelotopoeon       | 0.241553 | 0.007848 | 30.779 | 383006 |
| H. assulta     | H. punctigera        | H. armigera conferta | 0.075189 | 0.002382 | 31.567 | 368274 |
| H. assulta     | H. punctigera        | H. hardwicki         | 0.745129 | 0.022581 | 32.998 | 388924 |
| H. gelotopoeon | H. armigera armigera | H. zea               | 0.614654 | 0.015125 | 40.638 | 368271 |
| H. gelotopoeon | H. armigera armigera | H. assulta           | 0.510722 | 0.012539 | 40.732 | 368271 |
| H. gelotopoeon | H. armigera armigera | H. armigera conferta | 0.028975 | 0.00131  | 22.126 | 368271 |
| H. gelotopoeon | H. armigera armigera | H. hardwicki         | 0.838412 | 0.021352 | 39.266 | 368271 |
| H. gelotopoeon | H. armigera armigera | H. punctigera        | 0.285998 | 0.006133 | 46.636 | 368271 |
| H. gelotopoeon | H. zea               | H. armigera armigera | 0.049184 | 0.000938 | 52.46  | 368271 |
| H. gelotopoeon | H. zea               | H. assulta           | 0.507483 | 0.012685 | 40.005 | 374536 |
| H. gelotopoeon | H. zea               | H. armigera conferta | 0.064167 | 0.00175  | 36.668 | 368271 |
| H. gelotopoeon | H. zea               | H. hardwicki         | 0.826286 | 0.020694 | 39.928 | 375848 |
| H. gelotopoeon | H. zea               | H. punctigera        | 0.283991 | 0.005986 | 47.444 | 373467 |
| H. gelotopoeon | H. assulta           | H. armigera armigera | 0.064757 | 0.001773 | 36.523 | 368271 |
| H. gelotopoeon | H. assulta           | H. zea               | 0.645089 | 0.016416 | 39.297 | 374536 |
| H. gelotopoeon | H. assulta           | H. armigera conferta | 0.077356 | 0.002414 | 32.038 | 368272 |
| H. gelotopoeon | H. assulta           | H. hardwicki         | 0.761955 | 0.02268  | 33.596 | 388558 |
| H. gelotopoeon | H. assulta           | H. punctigera        | 0.284612 | 0.006082 | 46.792 | 383006 |
| H. gelotopoeon | H. armigera conferta | H. armigera armigera | 0.003865 | 0.000385 | 10.049 | 368271 |
| H. gelotopoeon | H. armigera conferta | H. zea               | 0.608329 | 0.015165 | 40.114 | 368271 |
| H. gelotopoeon | H. armigera conferta | H. assulta           | 0.504596 | 0.012514 | 40.324 | 368272 |
| H. gelotopoeon | H. armigera conferta | H. hardwicki         | 0.81233  | 0.021296 | 38.145 | 368273 |
| H. gelotopoeon | H. armigera conferta | H. punctigera        | 0.28023  | 0.006137 | 45.664 | 368272 |

|                      |                      |                      |          |          |        |        |
|----------------------|----------------------|----------------------|----------|----------|--------|--------|
| H. gelotopoeon       | H. hardwicki         | H. armigera armigera | 0.051373 | 0.001434 | 35.821 | 368271 |
| H. gelotopoeon       | H. hardwicki         | H. zea               | 0.606573 | 0.014834 | 40.891 | 375848 |
| H. gelotopoeon       | H. hardwicki         | H. assulta           | 0.392651 | 0.012502 | 31.407 | 388558 |
| H. gelotopoeon       | H. hardwicki         | H. armigera conferta | 0.057804 | 0.002213 | 26.116 | 368273 |
| H. gelotopoeon       | H. hardwicki         | H. punctigera        | 0.27074  | 0.006144 | 44.067 | 383926 |
| H. gelotopoeon       | H. punctigera        | H. armigera armigera | 0.107523 | 0.002359 | 45.581 | 368271 |
| H. gelotopoeon       | H. punctigera        | H. zea               | 0.737324 | 0.018269 | 40.36  | 373467 |
| H. gelotopoeon       | H. punctigera        | H. assulta           | 0.608008 | 0.014777 | 41.145 | 383006 |
| H. gelotopoeon       | H. punctigera        | H. armigera conferta | 0.112217 | 0.002785 | 40.295 | 368272 |
| H. gelotopoeon       | H. punctigera        | H. hardwicki         | 0.9343   | 0.024745 | 37.756 | 383926 |
| H. armigera conferta | H. armigera armigera | H. zea               | 0.705617 | 0.016589 | 42.534 | 368271 |
| H. armigera conferta | H. armigera armigera | H. assulta           | 0.645844 | 0.014688 | 43.972 | 368271 |
| H. armigera conferta | H. armigera armigera | H. gelotopoeon       | 0.452051 | 0.013049 | 34.644 | 368271 |
| H. armigera conferta | H. armigera armigera | H. hardwicki         | 0.909124 | 0.023932 | 37.988 | 368271 |
| H. armigera conferta | H. armigera armigera | H. punctigera        | 0.454369 | 0.009973 | 45.561 | 368271 |
| H. armigera conferta | H. zea               | H. armigera armigera | 0.006811 | 0.000304 | 22.401 | 368271 |
| H. armigera conferta | H. zea               | H. assulta           | 0.544313 | 0.013349 | 40.775 | 368272 |
| H. armigera conferta | H. zea               | H. gelotopoeon       | 0.365313 | 0.011411 | 32.015 | 368271 |
| H. armigera conferta | H. zea               | H. hardwicki         | 0.810664 | 0.021113 | 38.396 | 368272 |
| H. armigera conferta | H. zea               | H. punctigera        | 0.381179 | 0.00866  | 44.015 | 368271 |
| H. armigera conferta | H. assulta           | H. armigera armigera | 0.006505 | 0.000323 | 20.11  | 368271 |
| H. armigera conferta | H. assulta           | H. zea               | 0.611    | 0.015153 | 40.321 | 368272 |
| H. armigera conferta | H. assulta           | H. gelotopoeon       | 0.332814 | 0.009882 | 33.677 | 368272 |
| H. armigera conferta | H. assulta           | H. hardwicki         | 0.713989 | 0.021552 | 33.129 | 368291 |
| H. armigera conferta | H. assulta           | H. punctigera        | 0.35513  | 0.007593 | 46.772 | 368274 |
| H. armigera conferta | H. gelotopoeon       | H. armigera armigera | 0.003865 | 0.000385 | 10.049 | 368271 |
| H. armigera conferta | H. gelotopoeon       | H. zea               | 0.608329 | 0.015165 | 40.114 | 368271 |
| H. armigera conferta | H. gelotopoeon       | H. assulta           | 0.504596 | 0.012514 | 40.324 | 368272 |
| H. armigera conferta | H. gelotopoeon       | H. hardwicki         | 0.81233  | 0.021296 | 38.145 | 368273 |

|                      |                      |                      |          |          |        |        |
|----------------------|----------------------|----------------------|----------|----------|--------|--------|
| H. armigera conferta | H. gelotopoeon       | H. punctigera        | 0.28023  | 0.006137 | 45.664 | 368272 |
| H. armigera conferta | H. hardwicki         | H. armigera armigera | 0.016662 | 0.000259 | 64.227 | 368271 |
| H. armigera conferta | H. hardwicki         | H. zea               | 0.62302  | 0.014333 | 43.466 | 368272 |
| H. armigera conferta | H. hardwicki         | H. assulta           | 0.44726  | 0.013255 | 33.743 | 368291 |
| H. armigera conferta | H. hardwicki         | H. gelotopoeon       | 0.381004 | 0.010651 | 35.771 | 368273 |
| H. armigera conferta | H. hardwicki         | H. punctigera        | 0.380806 | 0.008131 | 46.832 | 368275 |
| H. armigera conferta | H. punctigera        | H. armigera armigera | 0.007298 | 0.000348 | 20.992 | 368271 |
| H. armigera conferta | H. punctigera        | H. zea               | 0.613135 | 0.015015 | 40.834 | 368271 |
| H. armigera conferta | H. punctigera        | H. assulta           | 0.510649 | 0.012366 | 41.295 | 368274 |
| H. armigera conferta | H. punctigera        | H. gelotopoeon       | 0.246893 | 0.007853 | 31.438 | 368272 |
| H. armigera conferta | H. punctigera        | H. hardwicki         | 0.800821 | 0.021133 | 37.895 | 368275 |
| H. hardwicki         | H. armigera armigera | H. zea               | 0.601871 | 0.014509 | 41.481 | 368271 |
| H. hardwicki         | H. armigera armigera | H. assulta           | 0.423695 | 0.013309 | 31.835 | 368272 |
| H. hardwicki         | H. armigera armigera | H. gelotopoeon       | 0.354803 | 0.010815 | 32.806 | 368271 |
| H. hardwicki         | H. armigera armigera | H. armigera conferta | 0.018346 | 0.001441 | 12.729 | 368271 |
| H. hardwicki         | H. armigera armigera | H. punctigera        | 0.365071 | 0.008337 | 43.787 | 368271 |
| H. hardwicki         | H. zea               | H. armigera armigera | 0.055138 | 0.001551 | 35.547 | 368271 |
| H. hardwicki         | H. zea               | H. assulta           | 0.434265 | 0.013775 | 31.525 | 386061 |
| H. hardwicki         | H. zea               | H. gelotopoeon       | 0.366986 | 0.011718 | 31.319 | 375848 |
| H. hardwicki         | H. zea               | H. armigera conferta | 0.058484 | 0.002404 | 24.328 | 368272 |
| H. hardwicki         | H. zea               | H. punctigera        | 0.373062 | 0.008921 | 41.817 | 375574 |
| H. hardwicki         | H. assulta           | H. armigera armigera | 0.102263 | 0.001627 | 62.857 | 368272 |
| H. hardwicki         | H. assulta           | H. zea               | 0.712831 | 0.013818 | 51.588 | 386061 |
| H. hardwicki         | H. assulta           | H. gelotopoeon       | 0.431601 | 0.009154 | 47.15  | 388558 |
| H. hardwicki         | H. assulta           | H. armigera conferta | 0.097877 | 0.002035 | 48.095 | 368291 |
| H. hardwicki         | H. assulta           | H. punctigera        | 0.426708 | 0.0069   | 61.84  | 388924 |
| H. hardwicki         | H. gelotopoeon       | H. armigera armigera | 0.051373 | 0.001434 | 35.821 | 368271 |
| H. hardwicki         | H. gelotopoeon       | H. zea               | 0.606573 | 0.014834 | 40.891 | 375848 |
| H. hardwicki         | H. gelotopoeon       | H. assulta           | 0.392651 | 0.012502 | 31.407 | 388558 |



|               |                      |                      |          |          |        |        |
|---------------|----------------------|----------------------|----------|----------|--------|--------|
| H. hardwicki  | H. gelotopoeon       | H. armigera conferta | 0.057804 | 0.002213 | 26.116 | 368273 |
| H. hardwicki  | H. gelotopoeon       | H. punctigera        | 0.27074  | 0.006144 | 44.067 | 383926 |
| H. hardwicki  | H. armigera conferta | H. armigera armigera | 0.016662 | 0.000259 | 64.227 | 368271 |
| H. hardwicki  | H. armigera conferta | H. zea               | 0.62302  | 0.014333 | 43.466 | 368272 |
| H. hardwicki  | H. armigera conferta | H. assulta           | 0.44726  | 0.013255 | 33.743 | 368291 |
| H. hardwicki  | H. armigera conferta | H. gelotopoeon       | 0.381004 | 0.010651 | 35.771 | 368273 |
| H. hardwicki  | H. armigera conferta | H. punctigera        | 0.380806 | 0.008131 | 46.832 | 368275 |
| H. hardwicki  | H. punctigera        | H. armigera armigera | 0.060454 | 0.001292 | 46.809 | 368271 |
| H. hardwicki  | H. punctigera        | H. zea               | 0.623503 | 0.014691 | 42.44  | 375574 |
| H. hardwicki  | H. punctigera        | H. assulta           | 0.411806 | 0.012637 | 32.587 | 388924 |
| H. hardwicki  | H. punctigera        | H. gelotopoeon       | 0.258457 | 0.007819 | 33.055 | 383926 |
| H. hardwicki  | H. punctigera        | H. armigera conferta | 0.062495 | 0.002129 | 29.355 | 368275 |
| H. punctigera | H. armigera armigera | H. zea               | 0.612091 | 0.014967 | 40.895 | 368271 |
| H. punctigera | H. armigera armigera | H. assulta           | 0.508812 | 0.01229  | 41.399 | 368271 |
| H. punctigera | H. armigera armigera | H. gelotopoeon       | 0.239866 | 0.007845 | 30.577 | 368271 |
| H. punctigera | H. armigera armigera | H. armigera conferta | 0.026124 | 0.001347 | 19.394 | 368271 |
| H. punctigera | H. armigera armigera | H. hardwicki         | 0.819908 | 0.021109 | 38.841 | 368271 |
| H. punctigera | H. zea               | H. armigera armigera | 0.050378 | 0.000935 | 53.867 | 368271 |
| H. punctigera | H. zea               | H. assulta           | 0.508342 | 0.01273  | 39.933 | 373995 |
| H. punctigera | H. zea               | H. gelotopoeon       | 0.242311 | 0.00798  | 30.365 | 373467 |
| H. punctigera | H. zea               | H. armigera conferta | 0.062308 | 0.001778 | 35.039 | 368271 |
| H. punctigera | H. zea               | H. hardwicki         | 0.810214 | 0.02063  | 39.274 | 375574 |
| H. punctigera | H. assulta           | H. armigera armigera | 0.065581 | 0.001701 | 38.553 | 368271 |
| H. punctigera | H. assulta           | H. zea               | 0.644294 | 0.016288 | 39.556 | 373995 |
| H. punctigera | H. assulta           | H. gelotopoeon       | 0.241553 | 0.007848 | 30.779 | 383006 |
| H. punctigera | H. assulta           | H. armigera conferta | 0.075189 | 0.002382 | 31.567 | 368274 |
| H. punctigera | H. assulta           | H. hardwicki         | 0.745129 | 0.022581 | 32.998 | 388924 |
| H. punctigera | H. gelotopoeon       | H. armigera armigera | 0.107523 | 0.002359 | 45.581 | 368271 |
| H. punctigera | H. gelotopoeon       | H. zea               | 0.737324 | 0.018269 | 40.36  | 373467 |

|                      |                      |                       |          |          |        |        |
|----------------------|----------------------|-----------------------|----------|----------|--------|--------|
| H. punctigera        | H. gelotopoeon       | H. assulta            | 0.608008 | 0.014777 | 41.145 | 383006 |
| H. punctigera        | H. gelotopoeon       | H. armigera conferta  | 0.112217 | 0.002785 | 40.295 | 368272 |
| H. punctigera        | H. gelotopoeon       | H. hardwicki          | 0.9343   | 0.024745 | 37.756 | 383926 |
| H. punctigera        | H. armigera conferta | H. armigera armigera  | 0.007298 | 0.000348 | 20.992 | 368271 |
| H. punctigera        | H. armigera conferta | H. zea                | 0.613135 | 0.015015 | 40.834 | 368271 |
| H. punctigera        | H. armigera conferta | H. assulta            | 0.510649 | 0.012366 | 41.295 | 368274 |
| H. punctigera        | H. armigera conferta | H. gelotopoeon        | 0.246893 | 0.007853 | 31.438 | 368272 |
| H. punctigera        | H. armigera conferta | H. hardwicki          | 0.800821 | 0.021133 | 37.895 | 368275 |
| H. punctigera        | H. hardwicki         | H. armigera armigera  | 0.060454 | 0.001292 | 46.809 | 368271 |
| H. punctigera        | H. hardwicki         | H. zea                | 0.623503 | 0.014691 | 42.44  | 375574 |
| H. punctigera        | H. hardwicki         | H. assulta            | 0.411806 | 0.012637 | 32.587 | 388924 |
| H. punctigera        | H. hardwicki         | H. gelotopoeon        | 0.258457 | 0.007819 | 33.055 | 383926 |
| H. punctigera        | H. hardwicki         | H. armigera conferta  | 0.062495 | 0.002129 | 29.355 | 368275 |
| H. armigera armigera | H. zea USA           | Brazilian H. armigera | -0.00914 | 0.001175 | -7.775 | 368271 |
